# Supplementary material for: Transformation of sodium 1-amino-4-arylaminoanthraquinone-2-sulfonates in an aqueous medium
Source: MDPI journal article supplement (doi:10.3390/jof10050315), 1988-08-20
Supplement: s1 [file s1]

**Table S2 Candidate gene primer sequences**

| <b>Primer name</b> | <b>Primer sequence (5'-3')</b> |
|--------------------|--------------------------------|
| Cg-OG0034811-F     | CTGAACTGCACTGCAGCAA            |
| Cg-OG0034811-R     | CCACACGATGCACCTCTGTT           |
| Cg-OG0034817-F     | CGTTCGTTGCAGAGCCTAAC           |
| Cg-OG0034817-R     | GCAGCATTCACCGCAAGTTT           |
| Cg-OG0034823-F     | TGGAAACGGGAAGTTGGTCAG          |
| Cg-OG0034823-R     | CCGTCGTGCAAACCAACAG            |
| Cg-OG0034840-F     | AGGCAGCTTAGCAATCCGAA           |
| Cg-OG0034840-R     | CGGAGAATCTCTGCAAGGGG           |
